# Supplementary material
Source: PubMed Central journal article supplement (PMC356984)
Supplement: pnas_0304622101_4.pdf [file pnas_0304622101_4.pdf]

**Table 5. The insertion sequences (IS) in PAPI-1 and PAPI-2 and the corresponding IS families**

| IS name | PAPI-1        |             | PAPI-2      |             | Characteristics of IS |           |
|---------|---------------|-------------|-------------|-------------|-----------------------|-----------|
|         | Position      | Length (bp) | Position    | Length (bp) | Original length (bp)  | IS family |
| ISPpu14 | 56,778-59,119 | 2,341       | 7,034-7,999 | 966         | 2,383                 | IS66      |
| IS222   | -             | -           | 2,980-4,201 | 1,222       | 1,232                 | IS3       |
